# Supplementary material for: Hepatic Glucose Output Inhibition by Mexican Plants Used in the Treatment of Type 2 Diabetes
Source: PubMed Central journal article supplement (PMC7065531; doi:10.3389/fphar.2020.00215), 2020-03-03
Supplement: Data_Sheet_2.pdf [file Data_Sheet_2.pdf]

**Table S2: Studied plants and extracts**

| Plant/Voucher                                                                               | Extract-dose                 | Reference/<br>Plant determination                 | Extract-dose<br>selected |
|---------------------------------------------------------------------------------------------|------------------------------|---------------------------------------------------|--------------------------|
| <i>Rhizophora mangle</i> L.<br>IMMSM15816                                                   | Water – 5.9 mg/kg            | (Andrade-Cetto and<br>Rubalcaba-Mares, 2012)*     |                          |
|                                                                                             | Water – 59 mg/kg             |                                                   |                          |
|                                                                                             | Ethanol-water – 9 mg/kg      | Andrade-Cetto A.                                  |                          |
|                                                                                             | Ethanol-water – 90 mg/kg     |                                                   | *                        |
| <i>Smilax moranensis</i><br>M.Martens & Galeotti<br>IMSS 15815                              | Water – 20 mg/kg             | (Andrade-Cetto, 2011)*                            |                          |
|                                                                                             | Water – 200 mg/kg            |                                                   |                          |
|                                                                                             | Ethanol-water – 8 mg/kg      | Ramiro Cruz Duran                                 |                          |
|                                                                                             | Ethanol-water – 80 mg/kg     |                                                   | *                        |
| <i>Ageratina petiolaris</i><br>(Moc. & Sessé ex<br>DC.) R.M.King &<br>H.Rob<br>MEXU-1333471 | Water - 40 mg/kg             | (Bustos-Brito et al.,<br>2016)*                   |                          |
|                                                                                             | Water - 160 mg/kg            |                                                   | *                        |
|                                                                                             | Methanolic - 67 mg/kg        | Jose Luis Villaseñor                              |                          |
|                                                                                             | Methanolic - 268 mg/kg       |                                                   |                          |
| <i>Bromelia karatas</i> L.<br>IMMSM15814<br>Syn. <i>B. plumieri</i>                         | Water – 35 mg/kg             | (Andrade-Cetto and<br>Medina-Hernández,<br>2013)* |                          |
|                                                                                             | Water – 350 mg/kg            |                                                   |                          |
|                                                                                             | Ethanol-Water – 30 mg/kg     | Ramiro Cruz Duran                                 |                          |
|                                                                                             | Ethanol-Water – 300 mg/Kg    |                                                   |                          |
|                                                                                             | Water – 218 mg/kg            | (Escandón-Rivera et al.,<br>2019)                 | *                        |
| <i>Equisetum<br/>myriochaetum</i> Schltl.<br>& Cham.<br>IMMSM 14689                         | Water (patients) – 330 mg/kg | (Revilla et al., 2002)*<br><br>Andrade-Cetto A.   | *                        |

Doses tested in previous works, the \* in the reference indicates the first description of the plant.
